# Supplementary material for: The surface engineering of cobalt carbide spheres through N, B co-doping achieved by room-temperature in situ anchoring effects for active and durable multifunctional electrocatalysts
Source: Royal Society of Chemistry journal article supplement (doi:10.1039/c9ta03762d), 2019-01-01
Supplement: c9ta03762d1.pdf [file c9ta03762d1.pdf]

## Electronic Supplementary Information

### **Surface engineering of cobalt carbide spheres through N, B Co-doping achieved by room-temperature in situ anchored effect for active and durable multifunctional electrocatalysts**

*Xinzhi Ma,<sup>a</sup> Kaiyue Li,<sup>a</sup> Xiao Zhang,<sup>b</sup> Bo Wei,<sup>\*c</sup> Huan Yang<sup>a</sup> Lina Liu,<sup>a</sup> Mingyi Zhang,<sup>b</sup> Xitian Zhang,<sup>\*b</sup> and Yujin Chen<sup>\*a</sup>*

*<sup>a</sup> Key Laboratory of In-Fiber Integrated Optics, Ministry of Education and College of Science, Harbin Engineering University, Harbin 150001, China.*

*<sup>b</sup> Key Laboratory for Photonic and Electronic Bandgap Materials, Ministry of Education and School of Physics and Electronic Engineering, Harbin Normal University, Harbin 150025, China.*

*<sup>c</sup> Department of Physics, Harbin Institute of Technology, 150001, Harbin 150001, China*

*\*Corresponding authors.*

E-mail addresses: [chenyujin@hrbeu.edu.cn](mailto:chenyujin@hrbeu.edu.cn) (Y. Chen), [xtzhangzhang@hotmail.com](mailto:xtzhangzhang@hotmail.com)

(X. Zhang), [bowei@hit.edu.cn](mailto:bowei@hit.edu.cn) (B. Wei)

## Experimental Section

**Chemicals.** All chemicals including cobalt (purity, >99.99%; diameter, ~0.5  $\mu\text{m}$ , Aladdin Chemical Co., Ltd.), active carbon powder (purity, >99.99%; diameter, Aladdin Chemical Co., Ltd.), and  $\text{NaBH}_4$  (purity, >98%; diameter, Aladdin Chemical Co., Ltd.) were of analytical grade and used as-received without further purification.

**Synthesis of  $\text{Co}_3\text{C}$  and  $\text{Co}_3\text{C-B}$ .** The synthesis of high-performance materials was mainly through a ball-milled method and followed a reduction reaction by  $\text{NaBH}_4$ . Firstly, the cobalt powder and pure active carbon were mixed with a mole ratio of 1:1 and were ball-milled using a planetary ball mill (Fritsch Pulverisette 4) with the ball-to-powder weight ratio of 20:1. Before ball milling, the grinding bowls were performed an Ar (99.99%) inflation–deflation process to remove the inner air and further vacuumed the pressure of bowls to 95 Kpa. The ball milling was carried out at a rotational speed of 900 rpm/min for 10 h. Then the product was taken out and dipped in 0.5 M  $\text{NaBH}_4$  ethanol solution with continuous stirring for 15 hours. Many fine air bubbles were generated during the violent reaction between  $\text{Co}_3\text{C}$  particles and  $\text{NaBH}_4$ . Finally, the products were cleaned with alcohol and deionized water for ten times. After the vacuum filtration processes, the powder was collected and dried at room temperature.

**Synthesis of  $\text{Co}_3\text{C-N}$  and  $\text{Co}_3\text{C-NB}$ .** Typically, active carbon powder was placed in the middle location of a tube furnace, and then heated to 700  $^\circ\text{C}$  at 10  $^\circ\text{C min}^{-1}$  under a flowing  $\text{NH}_3$  atmosphere and maintained for 3 h, and then allowed to cool to room temperature. The as-prepared N-doped active carbon powder was used as the carbon

source. For the synthesis of Co<sub>3</sub>C-N and Co<sub>3</sub>C-NB catalysts, the all experiment conditions are remaining the same.

**Structural Characterization.** X-ray powder diffraction (XRD) was performed using a Rigaku D/max2600 X-ray diffractometer with Cu-K $\alpha$  radiation ( $\lambda = 1.54178 \text{ \AA}$ ). The crystallite sizes of the Co<sub>3</sub>C-based materials with different relevant data of crystal planes are calculated by Scherrer equation:  $D = 0.9 \lambda / \beta \cos\theta$ , where D is the crystallite size,  $\lambda$  is the X-ray wavelength (0.15418 nm),  $\beta$  is the half-maximum breadth and  $\theta$  is the Bragg angle of different planes. The field-emission scanning electron microscopy (FE-SEM) images were taken on a SU 70, Hitachi, Japan. The transmission electron microscopy (TEM) was performed on a FEI, Tecnai TF20 field-emission electron microscope operated at an acceleration voltage of 200 kV. X-ray photoelectron spectra (XPS) were obtained on a ThermoFisher Scientific Company X-ray photoelectron spectrometer with Mg K $\alpha$  as the excitation source. The nitrogen adsorption-desorption isotherms and corresponding pore size distribution were measured using an ASAP 2010 accelerated surface area and porosimetry instrument (Micromeritics). Surface area was calculated using the Brunauer-Emmett-Teller (BET) equation.

**Electrochemical Activities of the Catalysts.** Electrochemical measurements were carried out in a three-electrode system on a VMP3 electrochemical workstation (BioLogic, France) with a standard three-electrode electrochemical cell coupled with a RRDE 3A RRDE-3A Rotating Ring Disk Apparatus.

**ORR and OER Activities of the Catalysts.** To assess the ORR and OER activities of

N-Co<sub>3</sub>C and Co<sub>3</sub>C before and after NaBH<sub>4</sub> treatments, commercial Pt/C powers were measured using a three-electrode configuration in 0.1 M KOH at a scan rate of 10 mV s<sup>-1</sup>.

These catalysts were loaded on the glassy carbon electrode (GCE) with the same loading mass of 0.353 mg cm<sup>-2</sup>. For simple catalysts without CC, typically, 5 mg catalysts mixed with 50 µl Nafion solution were dispersed in 550 ml of ethanol solution and sonicated for 30 min to form a homogeneous ink. And then, 3 µl dispersion solutions were dropped onto a glassy carbon electrode with a diameter of 3 mm. Carbon rod and Ag/AgCl (3M KCl saturated) were used as counter and reference electrodes, respectively. All the electrode potential were referenced to Ag/AgCl reference electrode, which was converted to reversible hydrogen electrode (RHE) using the equation  $E_{(RHE)} = E_{(Ag/AgCl)} + 0.059 \times PH + 0.198$ .

With regard to ORR experiment, the LSV polarization data was executed from 0.1~ -0.8V (vs. Ag/AgCl) at the scan rate of 10 mV s<sup>-1</sup> under various rotating speeds (400 rpm, 625 rpm, 900 rpm, 1,225 rpm, 1,600 rpm, 2,025 rpm). The Koutecky-levich equation as below was employed to calculate the transferred electron number (n) per O<sub>2</sub> molecule in the ORR process under different potential.

As for OER experiment, The LSV polarization data was recorded from 0.1~ 0.8 V (vs. Ag/AgCl) at the scan rate of 10 mV s<sup>-1</sup> under 1,600 rpm rotating speed. AC impedance measurements of the catalysts were performed in the same configuration at the overpotential of 400 mV vs. Ag/AgCl from 100 kHz to 10 mHz with a VMP 3 electrochemical workstation in O<sub>2</sub>-saturated 0.1 M KOH solution. For

chronoamperometric test, the catalyst were loaded on the carbon cloth and was also activated in O<sub>2</sub>-saturated alkaline medium for 20 cycles, and then a static overpotential and current density were fixed for a certain time during continuous ORR and OER process to obtain the curve of time dependence of the current density and potential, respectively.

**HER Activities of the Catalysts.** With regard to HER experiment, all the experiments were conducted the same condition except the LSV polarization data was executed from -0.936 ~ -1.436V (vs. Ag/AgCl) at the scan rate of 5 mV s<sup>-1</sup> under 1,600 rpm rotating speed in a 1M KOH.

**Rechargeable Zinc-Air Battery Assembly and Tests.** A custom-built rechargeable zinc-air battery was constructed, with a zinc plate anode and an electrocatalyst containing-cathode, connected by 6 M KOH and 0.2 M zinc acetate. The cathode was prepared by dropping the above catalyst inks onto the center area of carbon paper (1 cm in diameter) to achieve a loading of 1 mg cm<sup>-2</sup>.

**All-Solid-State Rechargeable Button Zinc-Air Battery Assembly.** All as-prepared catalysts were loaded on the carbon cloth to use as the air cathodes and zinc plates were polished to be used as the anodes. The alkaline gel electrolyte was prepared by dissolving KOH, Zn(CH<sub>3</sub>COO)<sub>2</sub> and PVA in deionized water at 90 °C under vigorous stirring until the solution became clear. All-solidstate zinc-air batteries were assembled by separating the air cathode and zinc anode with the alkaline gel polymer in button batteries with air vent.

**Full Water Splitting System Assembly.** Both the anode and cathode were prepared

by dropping the above catalyst inks onto the center area of carbon paper (1 cm in diameter) to achieve a loading of 1 mg cm<sup>-2</sup>. The LSV was collected at a scan rate of 5 mV s<sup>-1</sup> under the 1M KOH with iR corrected. And the chronoamperometric test were conducted after activated in O<sub>2</sub>-saturated alkaline medium for 20 cycles, and then a static current densities was fixed for a certain time during continuous full water splitting process to obtain the curve of time dependence of the potentials.

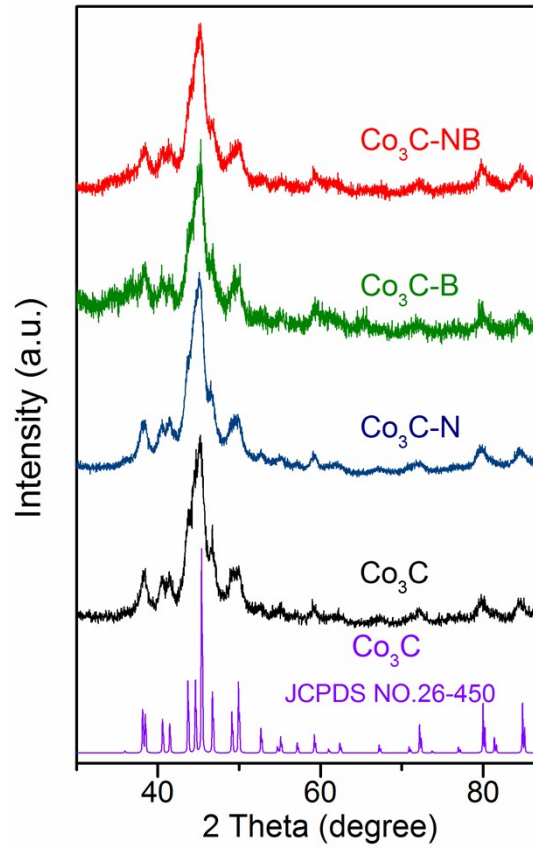

**Figure S1** XRD patterns of  $\text{Co}_3\text{C}$ ,  $\text{Co}_3\text{C-N}$ ,  $\text{Co}_3\text{C-B}$  and  $\text{Co}_3\text{C-NB}$ .

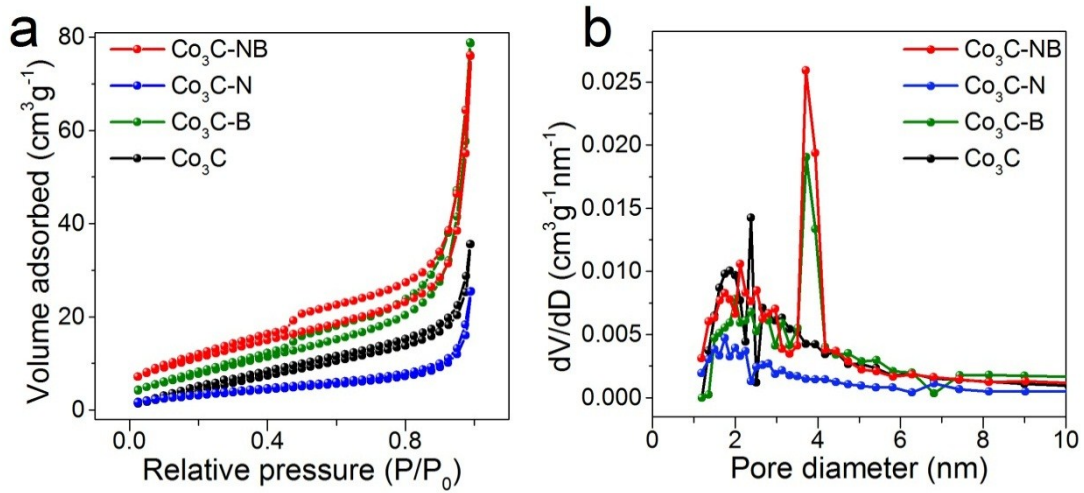

**Figure S2** (a, b)  $\text{N}_2$  adsorption-desorption isotherm and the corresponding pore-size distribution of these materials.

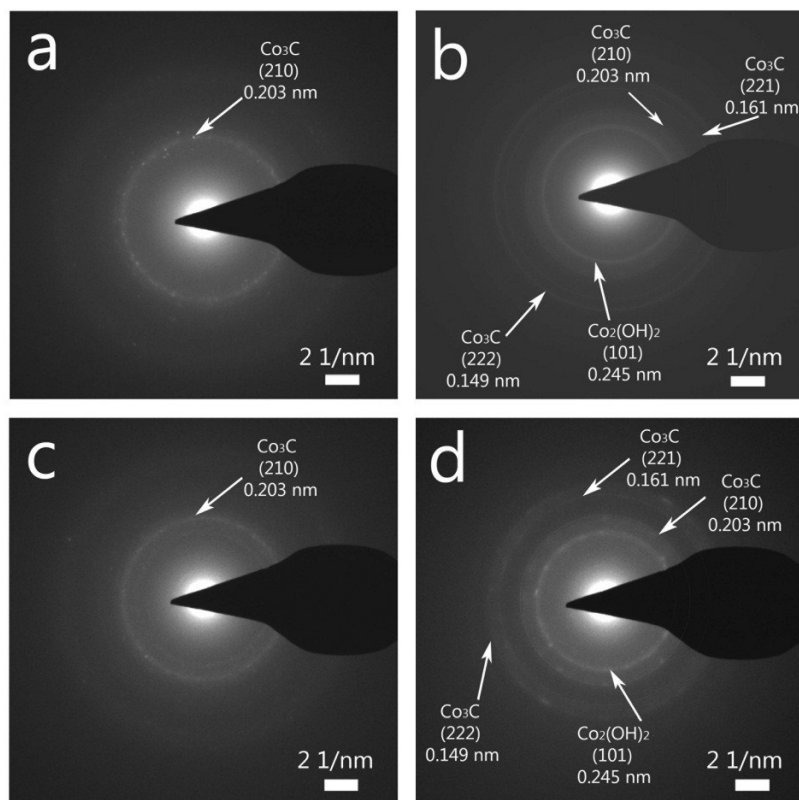

**Figure S3** (a, b, c and d) SAED patterns of  $\text{Co}_3\text{C}$ ,  $\text{Co}_3\text{C-B}$ ,  $\text{Co}_3\text{C-N}$  and  $\text{Co}_3\text{C-NB}$ .

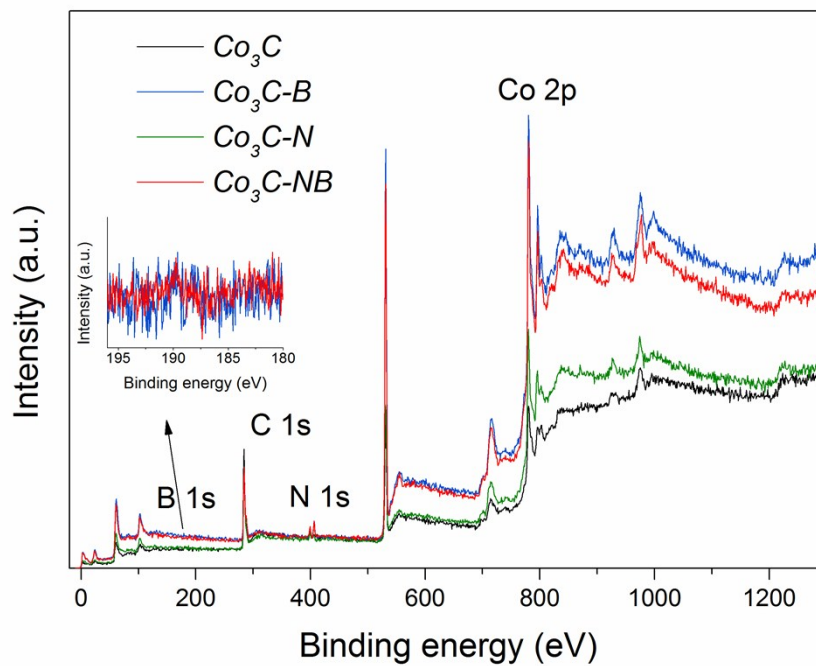

**Figure S4** Survey XPS spectrums of  $\text{Co}_3\text{C}$ -based samples.



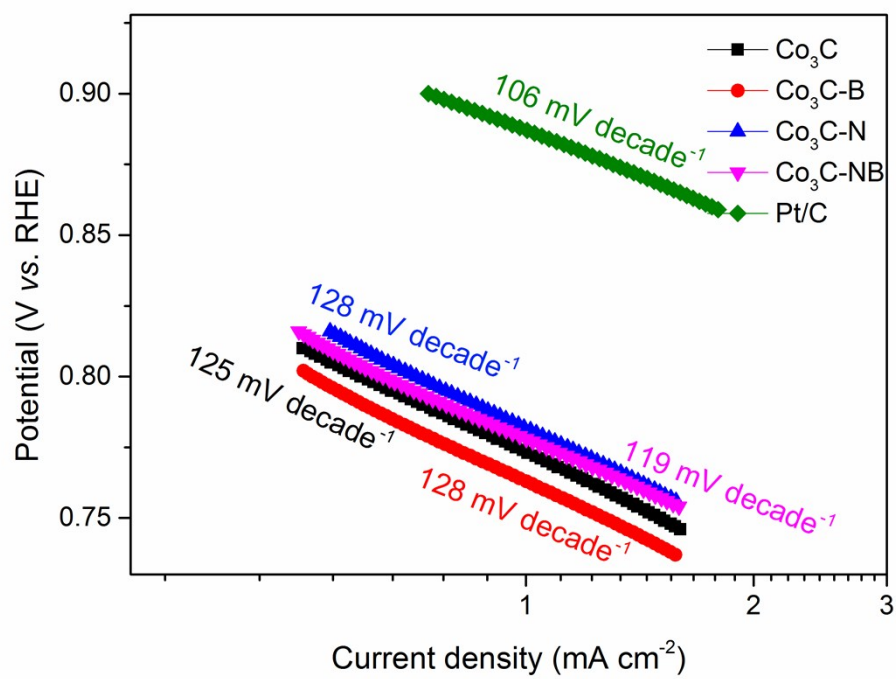

**Figure S5** The corresponding Tafel plots of Co<sub>3</sub>C-based samples toward ORR.

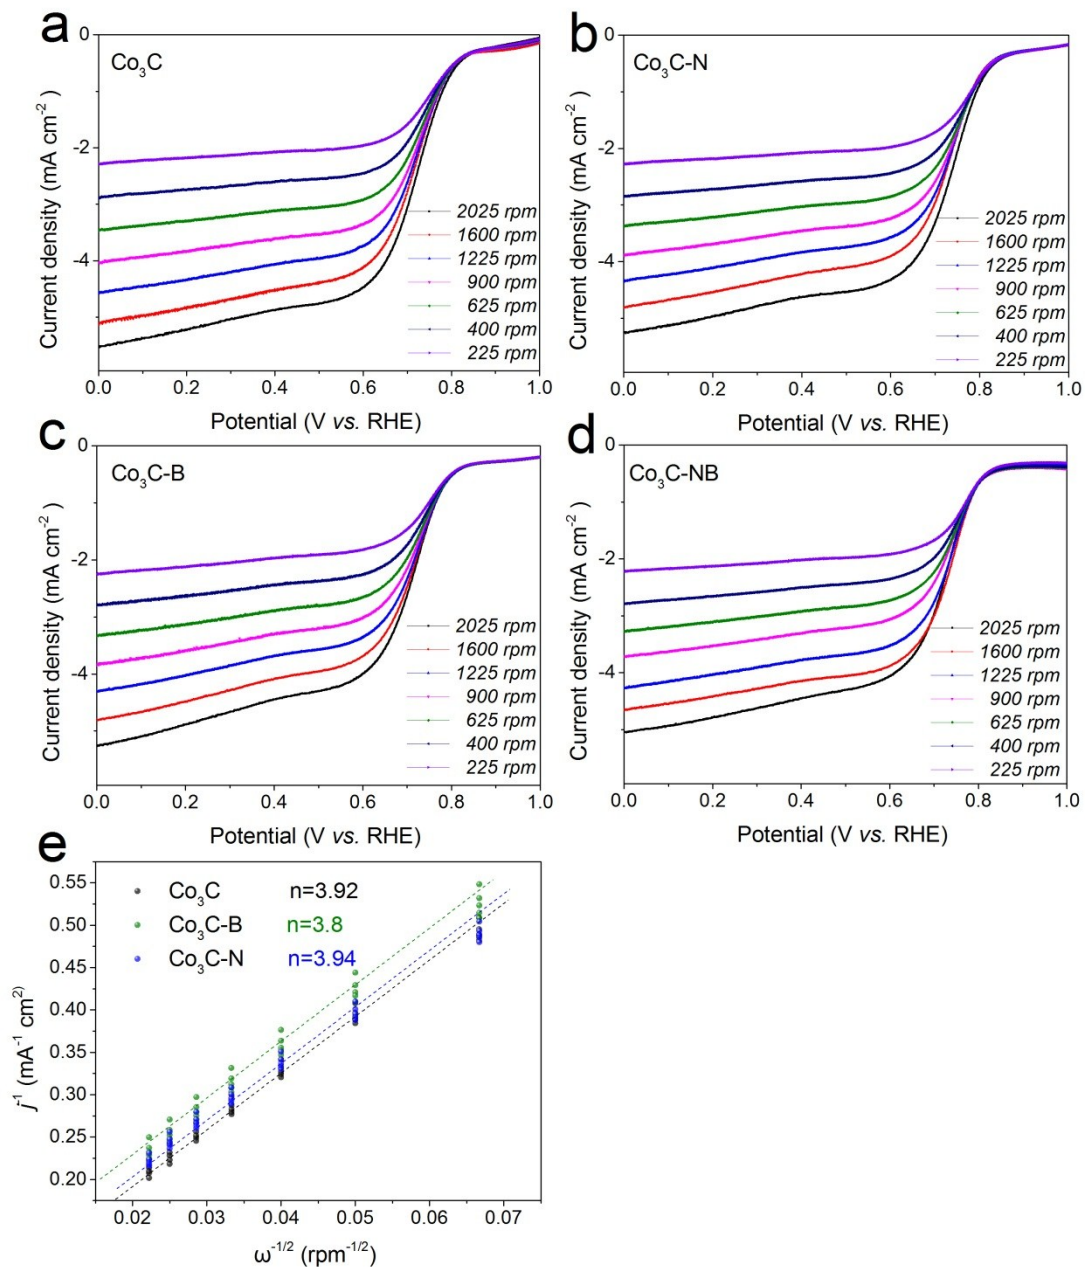

**Figure S6** (a, b, c and d) The LSV curves at different scan rates. e) The corresponding transfer numbers ( $n$ ) as calculated by the slope of Koutecky-Levich plots from the collected LSV data.

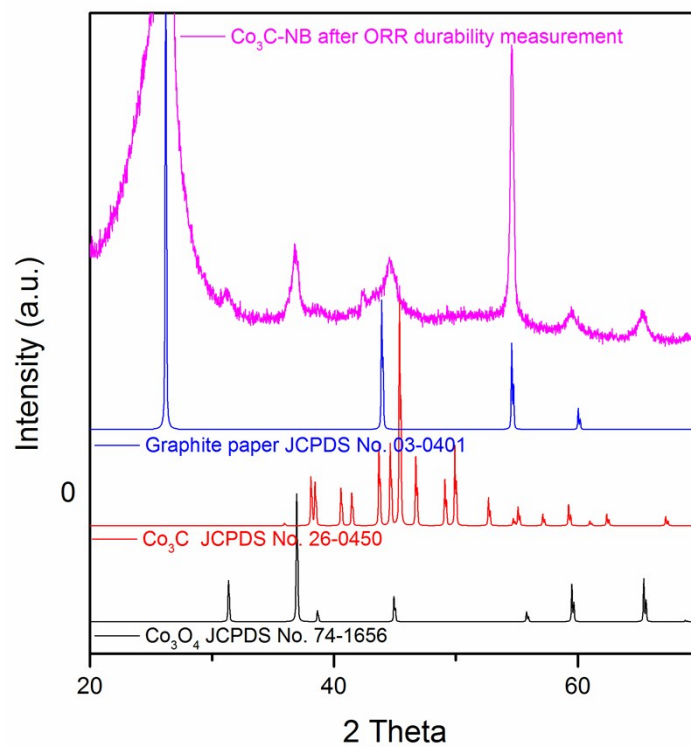

**Figure S7** XRD pattern of  $\text{Co}_3\text{C-NB}$  after ORR durability measurement at 0.2 V vs. RHE for 4 hours.

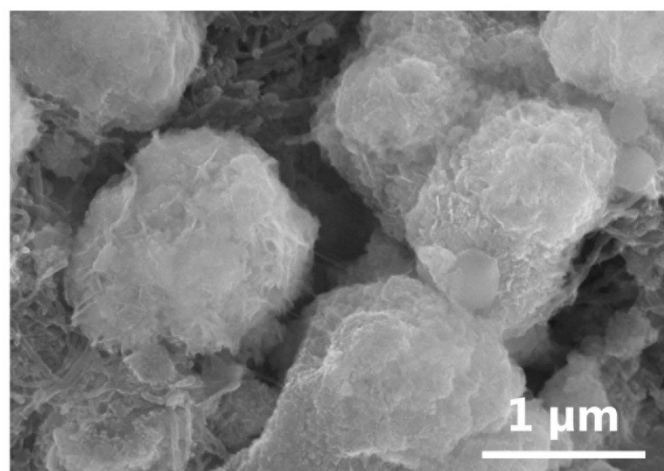

**Figure S8** SEM image for  $\text{Co}_3\text{C-NB}$  after ORR stability test.

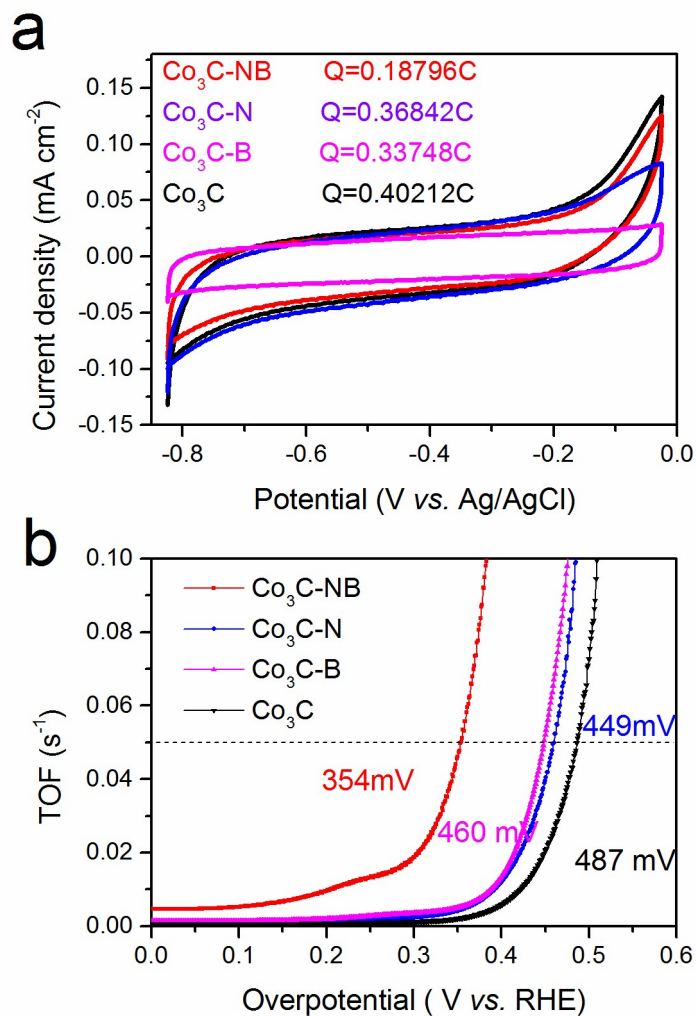

**Figure S9** (a) Cyclic voltammetry cycling in phosphate buffer (pH = 7) with a scan rate of 50 mV s<sup>-1</sup> range from -0.8 to 0 V vs. Ag/AgCl. (b) TOF data.

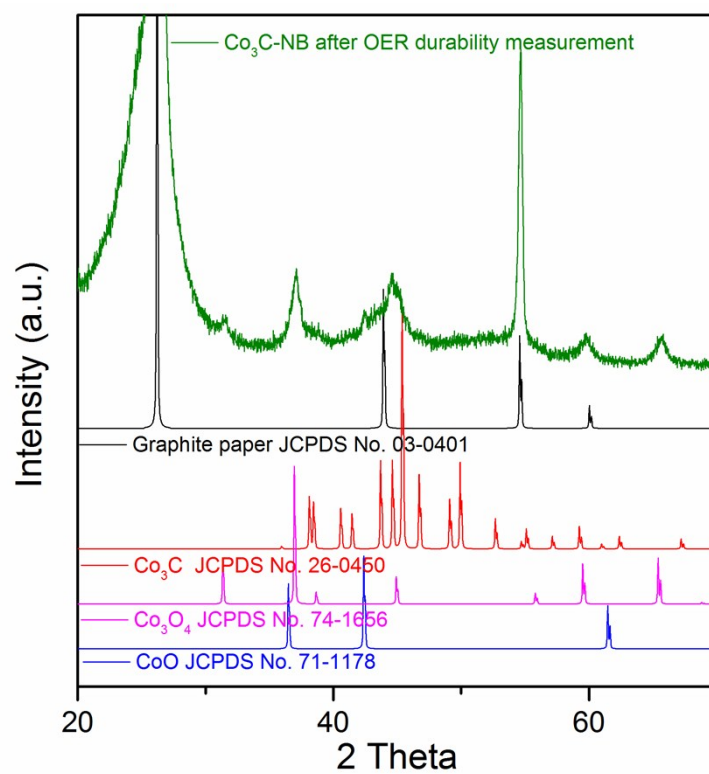

**Figure S10** XRD pattern of Co<sub>3</sub>C-NB after OER durability measurement at 0.2 V vs. RHE for 4 hours.

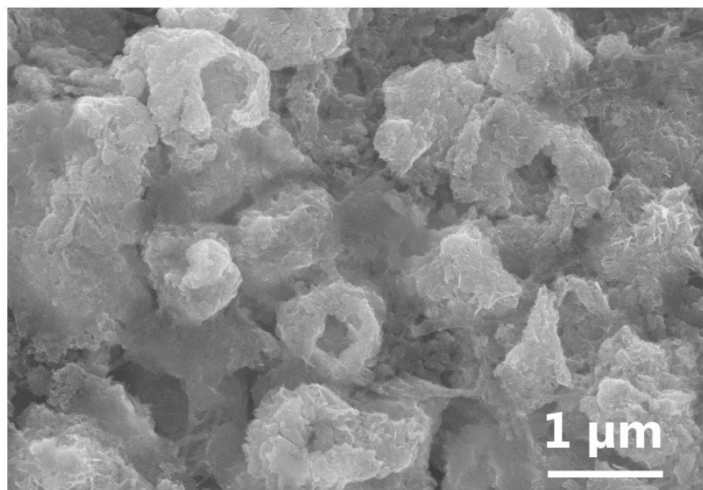

**Figure S11** SEM images for Co<sub>3</sub>C-NB after OER durable tests.

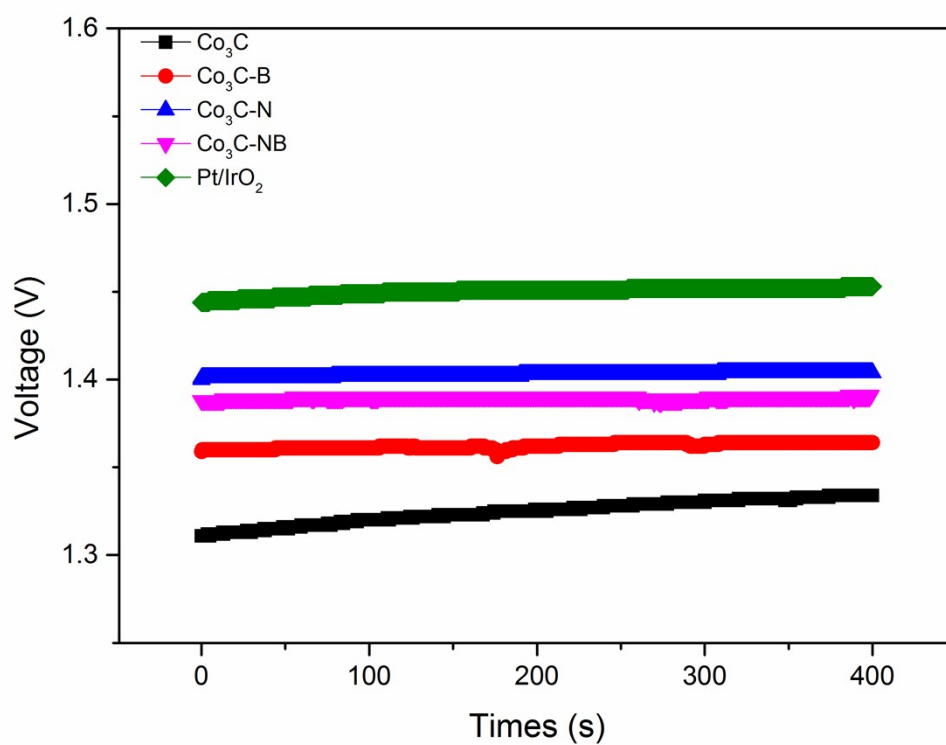

**Figure S12** Open-circuit plots of rechargeable zinc-air batteries using Co<sub>3</sub>C, Co<sub>3</sub>C-N, Co<sub>3</sub>C-B and Co<sub>3</sub>C-NB and Pt/IrO<sub>2</sub> as air cathodes.

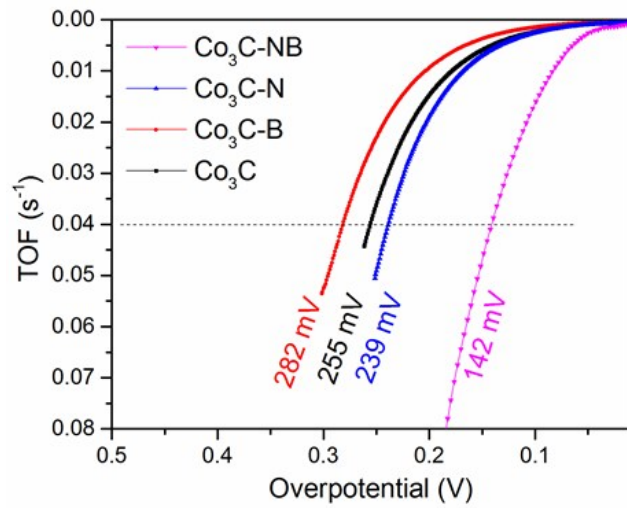

**Figure S13** TOF data for HER of  $\text{Co}_3\text{C}$ -based samples.

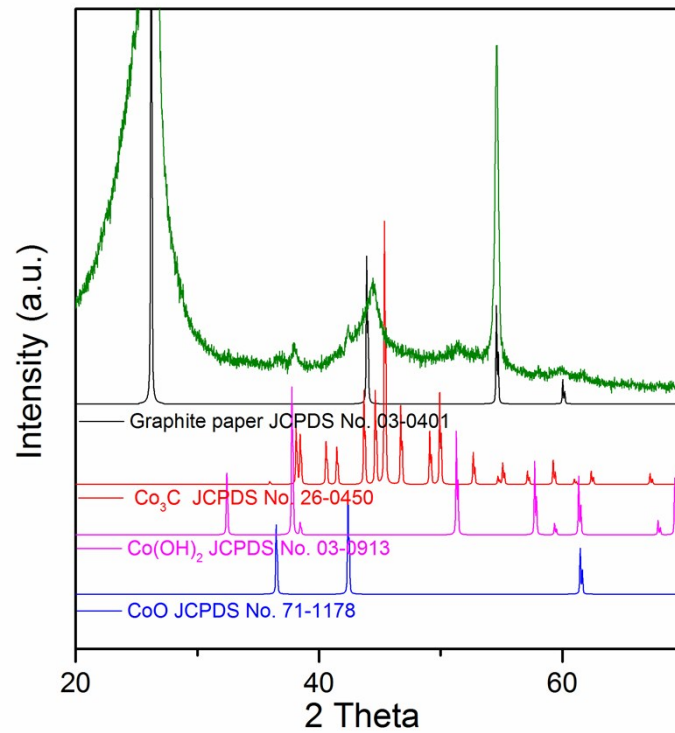

**Figure S14** XRD pattern of  $\text{Co}_3\text{C}$ -NB after HER durability measurement at 0.2 V vs. RHE for 4 hours.

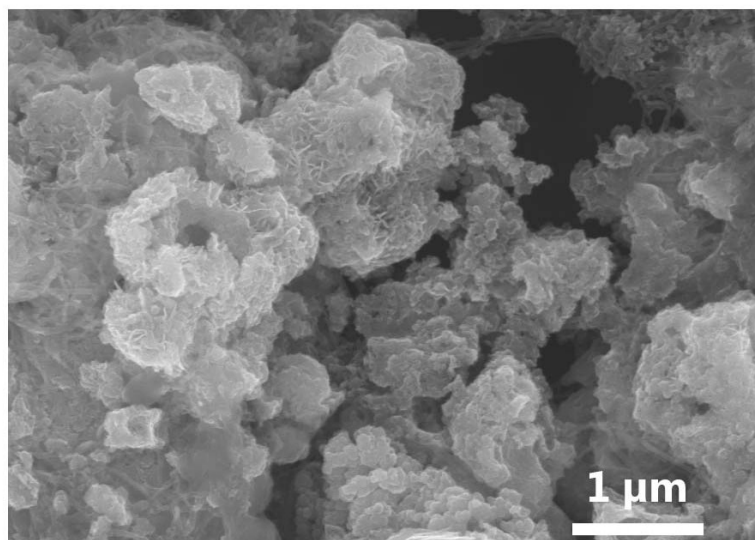

**Figure S15** SEM image for  $\text{Co}_3\text{C-NB}$  after HER stability test.

**Table S1** Content comparison of correspond elements of  $\text{Co}_3\text{C}$ ,  $\text{Co}_3\text{C-N}$ ,  $\text{Co}_3\text{C-B}$  and  $\text{Co}_3\text{C-NB}$ .

| <i>Element</i><br><i>Catalysts</i> | <i>Co 2p (at %)</i> | <i>C 1s (at %)</i> | <i>O 1s (at %)</i> | <i>N 1s (at %)</i> | <i>B 1s (at %)</i> |
|------------------------------------|---------------------|--------------------|--------------------|--------------------|--------------------|
| $\text{Co}_3\text{C}$              | 55.53               | 16.74              | 27.73              | –                  | –                  |
| $\text{Co}_3\text{C-N}$            | 63.35               | 10.56              | 24.61              | 1.48               | –                  |
| $\text{Co}_3\text{C-B}$            | 67.67               | 4.57               | 27.76              | –                  | –                  |
| $\text{Co}_3\text{C-NB}$           | 65.46               | 4.85               | 27.84              | 1.69               | 0.15               |



**Table S2** The normalized contents for respect C and N species in Co<sub>3</sub>C, Co<sub>3</sub>C-N, Co<sub>3</sub>C-B and Co<sub>3</sub>C-NB.

| Peak species |   | Co <sub>3</sub> C                       |                            | Co <sub>3</sub> C-N |                            | Co <sub>3</sub> C-B |                            | Co <sub>3</sub> C-NB |                            |       |
|--------------|---|-----------------------------------------|----------------------------|---------------------|----------------------------|---------------------|----------------------------|----------------------|----------------------------|-------|
|              |   | Peak position                           | Normalized Species content | Peak position       | Normalized Species content | Peak position       | Normalized Species content | Peak position        | Normalized Species content |       |
| C            | 1 | Co-C                                    | 283.73                     | 0.414               | 283.9                      | 0.273               | 283.84                     | 0.103                | 283.8                      | 0.172 |
|              | 2 | C-C                                     | 284.4                      | 0.276               | 284.4                      | 0.335               | 284.4                      | 0.467                | 284.4                      | 0.393 |
|              | 3 | C-defect or pure C-N                    | 285.5                      | 0.124               | 285.94                     | 0.15                | 285.5                      | 0.218                | 285.94                     | 0.083 |
|              | 4 | O-C/O=C-O                               | 288.2                      | 0.186               | 288.45                     | 0.172               | 288.5                      | 0.212                | 288.45                     | 0.205 |
|              | 5 | Pure-C-N                                | -                          | -                   | 287.32                     | 0.028               | -                          | -                    | 287.32                     | 0.044 |
|              | 6 | Pure-C-N                                | -                          | -                   | 284.8                      | 0.042               | -                          | -                    | 284.8                      | 0.086 |
|              | 7 | B-C                                     | -                          | -                   | -                          | -                   | -                          | -                    | 282.8                      | 0.017 |
| N            | 1 | Co-N <sub>x</sub> /Co-N <sub>x</sub> -B | -                          | -                   | 399.3                      | 0.236               | -                          | -                    | 399.17                     | 0.177 |
|              | 2 | Pyridinic-N                             | -                          | -                   | 398.7                      | 0.19                | -                          | -                    | 398.7                      | 0.107 |
|              | 3 | Pyrrolic-N                              | -                          | -                   | 400.15                     | 0.1425              | -                          | -                    | 400.15                     | 0.08  |
|              | 4 | Quaternary-N                            | -                          | -                   | 401.2                      | 0.0665              | -                          | -                    | 401.2                      | 0.025 |
|              | 5 | Oxidized-N                              | -                          | -                   | 403                        | 0.0475              | -                          | -                    | 403                        | 0.027 |
|              | 6 | Chemisorbed-N                           | -                          | -                   | 406.3                      | 0.3175              | -                          | -                    | 406.3                      | 0.529 |
|              | 7 | B-N                                     | -                          | -                   | -                          | -                   | -                          | -                    | 397.4                      | 0.055 |

**Table S3** Comparison of ORR activity of our Co<sub>3</sub>C-NB catalyst on glassy carbon electrode with those of the ORR catalysts reportedly previously.

| Catalysts                                                   | Tafel slope (mV dec <sup>-1</sup> ) | Electrolyte | loading                    | Halfwave potential | Refs.     |
|-------------------------------------------------------------|-------------------------------------|-------------|----------------------------|--------------------|-----------|
| Co <sub>3</sub> C-NB                                        |                                     | 0.1 M KOH   | 0.353 mg cm <sup>-2</sup>  | 0.748 V            | This work |
| Meso-CoNC@GF                                                | 75.7                                | M KOH       |                            | 0.87 V             | 1         |
| Mesoporous Co <sub>3</sub> O <sub>4</sub> /N-rGO Nanosheets | 54                                  | 0.1 M KOH   | 1.28 mg cm <sup>-2</sup>   | 0.79 V             | 2         |
| NiFe-LDH/Co <sub>2</sub> N-CNF                              | -                                   | 0.1 M KOH   | 0.12 mg cm <sup>-2</sup>   | 0.79 V             | 3         |
| Co <sub>3</sub> O <sub>4</sub> nanocrystals on graphene     |                                     | 0.1 M KOH   | 0.24 mg cm <sup>-2</sup>   | 0.83 V             | 9         |
| Co <sub>3</sub> C/VA-GNRs                                   | 45                                  | 0.1 M KOH   | 1.0 mg cm <sup>-2</sup>    | 0.77 V             | 15        |
| CoP@CC                                                      | -                                   | 0.1 M KOH   |                            | 0.67 V             | S1        |
| FeCo+NPC                                                    |                                     | 0.1 M KOH   |                            | 0.58 V             | 17        |
| Co/N/S-CNPs                                                 |                                     |             |                            | 0.87 V             | 18        |
| Co <sub>9</sub> S <sub>8</sub> (NS/rGO-Co)                  | 74                                  | 0.1 M KOH   |                            | 0.82 V             | 19        |
| Co/CoOx Nanoshoots on Perovskite Mesoporous Nanofibres      | -                                   | 0.1 M KOH   |                            | 0.76 V             | 20        |
| Co <sub>0.85</sub> Se@NC                                    |                                     | 0.1 M KOH   | 0.4 mg cm <sup>-2</sup>    | Morethan 0.8 V     | 22        |
| Co@NCNT                                                     | 94.8                                | 0.1 M KOH   | 0.425 mg cm <sup>-2</sup>  | 0.828 V            | 23        |
| Ni <sub>1</sub> Co <sub>4</sub> S@C-1000                    | -                                   | 0.1 M KOH   | 0.1415 mg cm <sup>-2</sup> | 0.60 V             | 24        |
| 15% PANI/ZIF-67                                             |                                     | 0.1 M KOH   | 0.6 mg cm <sup>-2</sup>    | 0.73 V             | 25        |
| Co <sub>9</sub> S <sub>8</sub> HMs-140/C                    | -                                   | 0.1 M KOH   | 0.8 mg cm <sup>-2</sup>    | 0.82 V             | 26        |
| Fe <sub>2</sub> P/Fe <sub>4</sub> N@C-800                   | 65                                  | 0.1 M KOH   | 0.3 mg cm <sup>-2</sup>    | 0.82 V             | 27        |
| Ni <sub>0.75</sub> Se nanocrystal                           | -                                   | 1 M KOH     | 0.6 mg cm <sup>-2</sup>    | ~0.74 V            | 28        |
| Mo-N/C@MoS <sub>2</sub>                                     |                                     | 0.1 M KOH   | -                          | 0.81 V             | 32        |
| GO-PANi <sub>31</sub> -FP                                   |                                     | 0.1 M KOH   | -                          | < 0.75 V           | 33        |
| Co <sub>15</sub> -N-C800                                    | 62                                  | 0.1 M KOH   | 0.49 mg cm <sup>-2</sup>   | 0.82 V             | 37        |
| CoP@SNC                                                     |                                     | 0.1 M KOH   | 0.6 mg cm <sup>-2</sup>    | 0.79               | 44        |
| N,B-codoped Defect-rich Graphitic Carbon                    | 65                                  | 0.1 M KOH   | 0.255 mg cm <sup>-2</sup>  | 0.835 V            | 47        |
| Co-N <sub>x</sub> -B <sub>y</sub> -C carbon nanosheets      | 64                                  | 0.1 M KOH   | 0.5 mg cm <sup>-2</sup>    | 0.83 V             | 48        |
| Single-crystal CoO Nano Rods                                | 47                                  | 1 M KOH     | 0.19 mg cm <sup>-2</sup>   | 0.85 V             | 56        |
| CoZn-NC-700                                                 | 60                                  | 0.1 M KOH   | 0.24 mg cm <sup>-2</sup>   | 0.84 V             | 64        |
| Co <sub>3</sub> FeS <sub>1.5</sub> (OH) <sub>6</sub>        | 96                                  | 0.1 M KOH   |                            | 0.721 V            | 61        |

**Table S4** Comparison of OER activity of our Co<sub>3</sub>C-NB catalyst on glassy carbon electrode with those of the OER catalysts reportedly previously.

| Catalysts                                                   | Tafel slope (mV dec <sup>-1</sup> ) | Electrolyte | Loading                    | $\eta$ (at 10mAcm <sup>-2</sup> ) | Refs.     |
|-------------------------------------------------------------|-------------------------------------|-------------|----------------------------|-----------------------------------|-----------|
| Co <sub>3</sub> C-NB                                        |                                     | 0.1 M KOH   | 0.353 mg cm <sup>-2</sup>  | 358 mV                            | This work |
| Meso-CoNC@GF                                                | 201                                 | 1 M KOH     |                            | 430 mV                            | 1         |
| Mesoporous Co <sub>3</sub> O <sub>4</sub> /N-rGO Nanosheets | 54                                  | 0.1 M KOH   | 0.128 mg cm <sup>-2</sup>  | 490 mV                            | 2         |
| NiFe-LDH/Co,N-CNF                                           | 60                                  | 0.1 M KOH   | 0.12 mg cm <sup>-2</sup>   | 312 mV                            | 3         |
| Co <sub>3</sub> O <sub>4</sub> nanocrystals/graphene        | 67                                  | 1 M KOH     | 0.24 mg cm <sup>-2</sup>   | 310 mV                            | 9         |
| Co <sub>3</sub> C particles                                 |                                     |             |                            | 455 mV                            | 16        |
| CoP@CC                                                      | 124                                 |             | 0.258 mg cm <sup>-2</sup>  | 300 mV                            | S1        |
| FeCo+NPC                                                    | 70                                  |             |                            | 360 mV                            | 11        |
| Co/N/S-CNPs                                                 | 130                                 | 0.1 M KOH   |                            | 370 mV                            | 18        |
| NS/rGO-Co <sub>4</sub>                                      | 72                                  | 0.1 M KOH   |                            | 265 mV                            | 19        |
| Co/CoO <sub>x</sub> /perovskite mesoporous nanofibres       |                                     | 0.1 M KOH   |                            | 410 mV                            | 20        |
| Co <sub>0.85</sub> Se@NC                                    | 75                                  | 1 M KOH     | 0.4 mg cm <sup>-2</sup>    | 320 mV                            | 22        |
| Co@NCNT                                                     | 116                                 | 1 M KOH     | 0.425 mg cm <sup>-2</sup>  | 429 mV                            | 23        |
| Ni <sub>1</sub> Co <sub>4</sub> S@C-1000                    | 64                                  | 0.1 M KOH   | 0.1415 mg cm <sup>-2</sup> | 240 mV                            | 24        |
| 15% PANI/ZIF-67                                             | 37                                  | 0.1 M KOH   | 0.6 mg cm <sup>-2</sup>    | 330 mV                            | 25        |
| Co <sub>9</sub> S <sub>8</sub> HMs-140/C                    | 113                                 | 0.1 M KOH   | 0.8 mg cm <sup>-2</sup>    | 420 mV                            | 26        |
| Fe <sub>2</sub> P/Fe <sub>4</sub> N@C-800                   | 177                                 | 1 M KOH     | 0.3 mg cm <sup>-2</sup>    | 410 mV                            | 27        |
| Ni <sub>0.5</sub> Se nanocrystal                            | 51                                  | 1 M KOH     | 0.6 mg cm <sup>-2</sup>    | 330 mV                            | 28        |
| Mo-N/C@MoS <sub>2</sub>                                     | 72                                  | 0.1 M KOH   |                            | 390 mV                            | 32        |
| GO-PANi <sub>31</sub> -FP                                   | 136                                 | 0.1 M KOH   |                            | ~570 mV                           | 33        |
| CoP@SNC                                                     | 68                                  | 1.0 M KOH   | 0.6 mg cm <sup>-2</sup>    | 350 mV                            | 44        |
| N,B-codoped Defect-rich Graphitic Carbon                    |                                     | 0.1 M KOH   | 0.255 mg cm <sup>-2</sup>  | 420 mV                            | 47        |
| Co-N <sub>x</sub> -B <sub>y</sub> -C carbon nanosheets      | -                                   | 0.1 M KOH   | 0.5 mg cm <sup>-2</sup>    | 430 mV                            | 52        |
| Co/NBC-900                                                  | 70                                  | 1.0 M KOH   |                            | 302 mV                            | 51        |
| Single-crystal CoO Nano Rods                                | 44                                  | 1 M KOH     | 0.19 mg cm <sup>-2</sup>   | 330 mV                            | 56        |
| Cobalt-defected Co <sub>3-x</sub> O <sub>4</sub>            | 38.2                                | 1 M KOH     |                            | 268 mV                            | S2        |
| Plasma-engraved Co <sub>3</sub> O <sub>4</sub> nanosheets   | 68                                  | 0.1 M KOH   |                            | 300 mV                            | 54        |
| Co <sub>2</sub> B nanoparticles                             |                                     | 0.1 M KOH   | 0.2 mg cm <sup>-2</sup>    | 371 mV                            | 67        |
| CoZn-NC-700                                                 | 69                                  | 0.1 M KOH   | 0.24 mg cm <sup>-2</sup>   | 390 mV                            | 57        |

|                                                      |      |           |                           |            |    |
|------------------------------------------------------|------|-----------|---------------------------|------------|----|
| Co <sub>3</sub> FeS <sub>1.5</sub> (OH) <sub>6</sub> | 79   | 0.1 M KOH |                           | 358 mV     | S3 |
| Amorphous Co <sub>2</sub> B-500/NG                   | 45   | 0.1 M KOH | 0.21 mg cm <sup>-2</sup>  | 380 mV     | 66 |
| Mn <sub>3</sub> O <sub>4</sub> /CoSe <sub>2</sub>    | 49   | 0.1 M KOH | 0.2 mg cm <sup>-2</sup>   | 450 mV     | S4 |
| Co <sub>9</sub> S <sub>8</sub> /N-C hybrid           | 75   | 0.1 M KOH | 0.8 mg cm <sup>-2</sup>   | 650mV/33mA | S5 |
| CoS <sub>2</sub> (400)/N <sub>2</sub> S-GO           | 75   | 0.1 M KOH | 0.528 mg cm <sup>-2</sup> | 390 mV     | S6 |
| N-Co <sub>9</sub> S <sub>8</sub> /graphene hybrid    | 82.7 | 0.1 M KOH | 0.2 mg cm <sup>-2</sup>   | 409 mV     | S7 |

**Table S5** Summary of Zn-air battery performance of catalysts used in this work.

|                        | Charge (V) | Discharge (V) | Band gap (V) | Efficiency |
|------------------------|------------|---------------|--------------|------------|
| Co <sub>3</sub> C      | 2.03       | 1.0733        | 0.9567       | 52.9%      |
| Co <sub>3</sub> C-N    | 2.0126     | 1.1288        | 0.8838       | 56.1%      |
| Co <sub>3</sub> C-B    | 2.0669     | 1.0956        | 0.9713       | 53%        |
| Co <sub>3</sub> C-NB   | 1.9959     | 1.1269        | 0.869        | 56.5%      |
| Pt/C+ IrO <sub>2</sub> | 2.0263     | 1.2162        | 0.8101       | 60%        |

**Table S6** Summary of multi-functional activity of the Co-based and other catalysts in literatures.

|                                               | Loading<br>(mg<br>cm <sup>-2</sup> ) | ORR                     |                                                  | OER                                   |                                               | Zn-air<br>batteries                                                |                                               |                                                                                                                                                          | Refs.        |
|-----------------------------------------------|--------------------------------------|-------------------------|--------------------------------------------------|---------------------------------------|-----------------------------------------------|--------------------------------------------------------------------|-----------------------------------------------|----------------------------------------------------------------------------------------------------------------------------------------------------------|--------------|
|                                               |                                      | E <sub>1/2</sub><br>(V) | Durability<br>Time/curre<br>nt density<br>vs.RHE | E <sub>j=10<sup>-2</sup></sub><br>(V) | Durability<br>Time/curre<br>nt density        | ΔE<br>(E <sub>j=10<sup>-2</sup></sub><br>E <sub>1/2</sub> )<br>(V) | Power<br>density<br>(mW<br>cm <sup>-2</sup> ) | Durability<br>Time/curre<br>nt density                                                                                                                   |              |
| Co <sub>3</sub> C-NB                          | 0.353                                | 0.748                   | 12h<br>/0.2V<br>vs.RHE                           | 1.588                                 | 12h<br>/50 mA cm <sup>-2</sup>                | 0.84                                                               | 45.4                                          | 180 h<br>/5 mA cm <sup>-2</sup><br>(custom-<br>built zinc-<br>air<br>batteries)<br>13 h<br>/20 mA cm <sup>-2</sup><br>(All solid<br>state<br>batterials) | This<br>work |
| CoP@CC                                        | 0.258                                | 0.67                    | 10h<br>/10 mA<br>cm <sup>-2</sup>                | 1.53                                  | 27.7h<br>/10 mA<br>cm <sup>-2</sup>           | 0.86                                                               | ~30                                           | 10h<br>/10 mAcm <sup>-2</sup>                                                                                                                            | [S1]<br>2017 |
| FeM/NPC<br>(M=Co, Ni)                         | 0.485                                | 0.78                    | ~25h<br>/10 mA<br>cm <sup>-2</sup>               | 1.59                                  | ~25h<br>/10 mA<br>cm <sup>-2</sup>            | 0.81                                                               | -                                             | 25h<br>/25 mA cm <sup>-2</sup>                                                                                                                           | [17]<br>2017 |
| Co/N/S-CNPs                                   | 0.275                                | 0.87                    |                                                  | 1.6                                   |                                               | 0.73                                                               | 96                                            | 40h<br>/5 mA cm <sup>-2</sup>                                                                                                                            | [18]<br>2018 |
| Co <sub>9</sub> S <sub>8</sub><br>(NS/rGO-Co) | 0.485                                | 0.82                    | 10h<br>/93.5%                                    | 1.52                                  | 10h<br>/76%                                   | 0.7                                                                | -                                             | -                                                                                                                                                        | [19]<br>2017 |
| Co/CoO <sub>x</sub><br>nanoshoots             |                                      | 0.76                    | 12h<br>/~ 100%                                   | 1.62                                  | 12h<br>/~ 95%                                 | 0.86                                                               | -                                             | -                                                                                                                                                        | [20]<br>2017 |
| Co <sub>0.85</sub> Se@NC                      | 0.4                                  | ~0.82                   | 12h<br>/~ 90%<br>/ 0.672 V                       | 1.55                                  | 12h<br>/~ 93.4%<br>/50 mA<br>cm <sup>-2</sup> | 0.8                                                                | 268                                           | 30h<br>/10 mA cm <sup>-2</sup>                                                                                                                           | [22]<br>2017 |
| Co@NCNT                                       | 0.425                                | 0.828                   | 3.5h<br>/~ 80%<br>/ 0.8 V                        | 1.659                                 | -                                             | 0.831                                                              | 138.82                                        | 16.5 h<br>/ 10 mA<br>cm <sup>-2</sup>                                                                                                                    | [23]<br>2016 |

|                                                                 |        |           |                            |      |                                                         |       |     |                                      |              |
|-----------------------------------------------------------------|--------|-----------|----------------------------|------|---------------------------------------------------------|-------|-----|--------------------------------------|--------------|
| Ni <sub>1</sub> Co <sub>4</sub> S@C-1000                        | 0.1415 | 0.6       | -                          | 1.51 | 2h<br>/~ 90%<br>/ 1.6 V                                 | 0.92  | -   | -                                    | [24]<br>2016 |
| PANI/ZIF-67                                                     | 0.6    | 0.75      | 1.5h<br>/~ 100%<br>/ 0.5 V | 1.56 | -                                                       | 0.83  | 45  | -                                    | [25]<br>2017 |
| Co <sub>9</sub> S <sub>8</sub> HMs-140/C                        | 0.8    | 0.82      | -                          | 1.65 | -                                                       | 0.83  | -   | -                                    | [26]<br>2017 |
| Fe <sub>2</sub> P/Fe <sub>4</sub> N@C-800                       | 0.3    | 0.8       | -                          | 1.64 | 2000 CV<br>cycles<br>/10 mV<br>overpotent<br>ial higher | 0.84  | -   | -                                    | [27]<br>2017 |
| Ni <sub>x</sub> Se<br>(0.5 ≤ x ≤ 1)                             | 0.6    | ~0.7<br>5 | -                          | 1.56 | 10h<br>/~ 98%<br>/10mA cm <sup>-2</sup>                 | -     | -   | 200cycles<br>/10 mA cm <sup>-2</sup> | [28]<br>2018 |
| Surface<br>Oxidation of<br>AuNi<br>Heterodimers                 | 0.186  | 0.73      | -                          | 1.58 | 3h<br>/~ 120%<br>/440 mV<br>overpotent<br>ial           | 0.85  | -   | -                                    | [29]<br>2018 |
| N, B-codoped<br>Defect-rich<br>Graphitic<br>Carbon<br>Nanocages | 0.255  | 0.83<br>5 | -                          | 1.65 | -                                                       | 0.815 | 320 | 14h<br>/10 mA cm <sup>-2</sup>       | [47]<br>2017 |

**Table S7** Comparison of HER activity of our Co<sub>3</sub>C-NB catalyst on glassy carbon electrode with those of the HER catalysts reportedly previously.

| Catalysts                                             | Tafel slope<br>(mV dec <sup>-1</sup> ) | Electrolyte                          | Loading                   | $\eta$<br>(at 10mAcm <sup>-2</sup> ) | Refs.     |
|-------------------------------------------------------|----------------------------------------|--------------------------------------|---------------------------|--------------------------------------|-----------|
| Co <sub>3</sub> C-NB                                  | 119                                    | 0.1 M KOH                            | 0.353 mg cm <sup>-2</sup> | 154 mV                               | This work |
| FeCo+NPC                                              | 125                                    | -                                    | -                         | 340 mV                               | 17        |
| Co/N/S-CNPs                                           | 108                                    | 1 M KOH                              | -                         | 240 mV                               | 18        |
| NS/rGO-Co <sub>4</sub>                                | -                                      | 0.1 M KOH                            | -                         | 193 mV                               | 19        |
| Co/CoO <sub>x</sub> /perovskite mesoporous nanofibres | -                                      | 1 M KOH                              | -                         | ~220 mV                              | 20        |
| Co <sub>0.85</sub> Se@NC                              | 125                                    | 1 M KOH                              | 0.4 mg cm <sup>-2</sup>   | 230 mV                               | 22        |
| Co@NCNT                                               | 93                                     | 0.1 M KOH                            | 0.425 mg cm <sup>-2</sup> | ~250 mV                              | 23        |
| 15% PANI/ZIF-67                                       | 123                                    | -                                    | 0.6 mg cm <sup>-2</sup>   | >350 mV                              | 25        |
| Co <sub>9</sub> S <sub>8</sub> HMs-140/C              | 108                                    | 0.1 M KOH                            | 0.8 mg cm <sup>-2</sup>   | 250 mV                               | 26        |
| Fe <sub>2</sub> P/Fe <sub>4</sub> N@C-800             | 130                                    | 0.5 M H <sub>2</sub> SO <sub>4</sub> | 0.3 mg cm <sup>-2</sup>   | 232 mV                               | 27        |
| Ni <sub>0.75</sub> Se                                 | 86                                     | 1 M KOH                              | -                         | 233 mV                               | 28        |
| Mo-N/C@MoS <sub>2</sub>                               | 64.3                                   | 1 M KOH                              | -                         | 117 mV                               | 32        |
| GO-PANi <sub>31</sub> -FP                             | -                                      | 0.1 M KOH                            | -                         | 520 mV                               | 33        |
| N-Co@G                                                | 98                                     | 0.1 M KOH                            | -                         | 337 mV                               | 38        |
| CoP@SNC                                               | 82                                     | 1.0 M KOH                            | 0.6 mg cm <sup>-2</sup>   | 174 mV                               | 44        |
| N,B-codoped Defect-rich Graphitic Carbon              | 82.1                                   | 0.5 M H <sub>2</sub> SO <sub>4</sub> | 0.383 mg cm <sup>-2</sup> | 175.3 mV                             | 47        |
| Co/NBC-900                                            | 146                                    | 1.0 M KOH                            | -                         | 117 mV                               | 51        |
| CoNi nanoalloy/graphene                               | 104                                    | Acidic electrolyte                   | 0.32 mg cm <sup>-2</sup>  | 224 mV                               | 59        |
| CoO <sub>x</sub> @CN                                  | 115                                    | 1 M KOH                              | 0.42 mg cm <sup>-2</sup>  | 232 mV                               | 64        |
| NG@Co-MMT                                             | -                                      | 0.5 M H <sub>2</sub> SO <sub>4</sub> | -                         | 210 mV                               | 73        |
| Co@BCN                                                | 73.2                                   | 1 M KOH                              | 1.5 mg cm <sup>-2</sup>   | 183 mV                               | 76        |



|            |   |  |                          |        |    |
|------------|---|--|--------------------------|--------|----|
| Co-NRCNTs  | - |  | 0.28 mg cm <sup>-2</sup> | 260 mV | S8 |
| FeCo@NCNTs | - |  | 0.32 mg cm <sup>-2</sup> | 276 mV | S9 |

## REFERENCES

- (S1) Y. F. Cheng, F. Liao, W. Shen, L. B. Liu, B. B. Jiang, Y. Q. Li and M. W. Shao, *Nanoscale*, **2017**, *9*, 18977.
- (S2) R. R. Zhang, Y. C. Zhang, L. Pan, G. Q. Shen, N. Mahmood, Y. H. Ma, Y. Shi, W. Y. Jia, L. Wang, X. W. Zhang, W. Xu and J. J. Zou, *ACS catal.*, **2018**, *8*, 3803.
- (S3) H. F. Wang, C. Tang, B. Wang, B. Q. Li and Q. Zhang, *Adv. Mater.*, **2017**, *29*, 1702327.
- (S4) M. R. Gao, Y. F. Xu, J. Jiang, Y. R. Zheng and S. H. Yu, *J. Am. Chem. Soc.*, **2012**, *134*, 2930.
- (S5) X. C. Cao, X. J. Zheng, J. H. Tiana, C. Jina, K. Keb and R. Z. Yang, *Electrochim. Acta*, **2016**, *191*, 776.
- (S6) P. Ganesan, M. Prabu, J. Sanetuntikul and S. Shanmugam, *ACS Catal.*, **2015**, *5*, 3625.
- (S7) S. Dou, L. Tao, J. Huo, S. Y. Wang and L. M. Dai, *Energy Environ. Sci.*, **2016**, *9*, 1320.
- (S8) X. Zou, X. Huang, A. Goswami, R. Silva, B. R. Sathe, E. Mikmeková, T. Asefa, *Angew. Chem.*, **2014**, *126*, 4461.
- (S9) J. Deng, P. J. Ren, D. H. Deng, L. Yu, F. Yang and X. H. Bao, *Energy Environ. Sci.*, **2014**, *7*, 1919.
